# Supplementary material for: Modelling the enantioselectivity of subtilisin in water and organic solvents: insights from molecular dynamics and quantum mechanical/molecular mechanical studies
Source: Royal Society of Chemistry journal article supplement (doi:10.1039/a909680i), 2000-01-01
Supplement: a909680is1.doc [file a909680is1.doc]

**Scheme 1** Model reaction in organic solvent. Atom labels are shown on the *S*-tetrahedral intermediate.
